# Supplementary material for: The Differential Effect of Senolytics on SASP Cytokine Secretion and Regulation of EMT by CAFs
Source: MDPI journal article supplement (doi:10.3390/ijms25074031), 2024-04-04
Supplement: s1 [file s1]

**Supplementary Table S1.** Primer sequences on mouse genes.

| Name               | Sequence                 |
|--------------------|--------------------------|
| m-p16-F            | CGTGAACATGTTGTTGAGGC     |
| m-p16-R            | GCAGAAGAGCTGCTACGTGA     |
| m-p21-F            | CAGATCCACAGCGATATCCA     |
| m-p21-R            | ACGGGACCGAAGAGACAAC      |
| mFap-F             | CCGCGTAACACAGGATTCAGT    |
| mFap-R             | CACACTTCTTGCTCGGAGGAGA   |
| m- $\alpha$ -Sma-F | CCCCTGAAGAGCATCGGACA     |
| m- $\alpha$ -Sma-R | TGGCGGGGACATTGAAGGT      |
| mZeb1-F            | ATTCAGCTACTGTGAGCCCTGC   |
| mZeb1-R            | CATTCTGGTCCTCCACAGTGGA   |
| mSnail-F           | TGTCTGCACGACCTGTGGAAAG   |
| mSnail-R           | CTTCACATCCGAGTGGGTTTGG   |
| mIl6 F             | TACCACTTCACAAGTCGGAGGC   |
| mIl6 R             | CTGCAAGTGCATCATCGTTGTTC  |
| mGapdh F           | TGGTGAAGGTCGGTGTGAAC     |
| mGapdh R           | CCGTTGAATTTGCCGTGAGT     |
| mIl10-F            | TACAGCCGGAAGACAATAA      |
| mIl10-R            | AGCAGTCGGTTAGCAGTATG     |
| mIl-1A-F           | AAGTCTCCAGGGCAGAGAGG     |
| mIl-1A-R           | CTGATTCAAGAGAGAGATGGTCAA |
| mIl-1B-F           | AAAAGCCTCGTGCTGTCG       |
| mIl-1B-R           | AGGCCACAGGTATTTTGTCTG    |
